# Supplementary material for: Genome-Wide Analysis of Ascorbic Acid Metabolism Related Genes in Fragaria × ananassa and Its Expression Pattern Analysis in Strawberry Fruits
Source: Front Plant Sci. 2022 Jul 6;13:954505. doi: 10.3389/fpls.2022.954505 (PMC9296770; doi:10.3389/fpls.2022.954505)
Supplement: Supplementary file 2 [file Table_2.XLSX]

## Sheet: Sheet1
Supplementary Table 2 The expression level of ascorbic acid metabolism related genes in achenes and receptacles at four ripening stages, leaves and roots of octoploid strawberry ‘Camarosa’. Green_A, green achene; White_A, white achene; Turning_A, turning achene; Red_A, red achene; Green_R, green receptacle; White_R, white receptacle; Turning_R, turning receptacle; Red_R, red receptacle.
Gene name	Gene locus	Expression level (TPM)
		Green_A	White_A	Turning_A	Red_A	Green_R	White_R	Turning_R	Red_R	Leaf	Root
PMI	maker-Fvb4-1-snap-gene-149.43	11.6617	6.54167	4.785	4.805	11.0883	14.925	12.0833	16.7133	9.02667	11.03
	maker-Fvb4-2-augustus-gene-52.34	11.5733	1.74333	0.346667	0.676667	24.9983	12.245	6.25667	4.47167	18.4633	7.61
	maker-Fvb4-3-augustus-gene-54.52	0.823333	0.0833333	0.05	0.133333	1.34667	1.63833	0.715	0.656667	1.71	0.603333
	maker-Fvb4-3-augustus-gene-82.40	0.923333	0.115	0.105	0.0133333	2.325	2.18833	0.883333	0.728333	3.07667	0.843333
	maker-Fvb4-4-snap-gene-50.64	14.56	21.1467	12.9467	11.1867	11.33	6.84333	6.065	15.7083	14.5067	7.31667
	maker-Fvb5-1-augustus-gene-134.53	14.2917	4.255	2.60333	3.05333	16.7767	8.97833	1.13667	0.486667	31.1167	1.60333
	maker-Fvb5-3-augustus-gene-155.47	3.05333	2.56833	0.69	0.545	0.951667	0.723333	0.443333	0.17	8.48667	0.246667
PMM	maker-Fvb7-1-augustus-gene-168.38	12.5333	1.59667	0.596667	1.06833	8.845	6.96333	4.735	4.51	12.6567	4.99667
	maker-Fvb7-2-augustus-gene-113.48	2.82667	0.515	0.135	0.315	3.84167	2.77167	2.17	2.58333	6.31	0.513333
	maker-Fvb7-2-snap-gene-178.60	5.59333	0.663333	0.296667	0.555	4	2.58667	1.68833	2.35167	4.87667	0.993333
	maker-Fvb7-4-augustus-gene-116.48	9.27833	1.80667	0.376667	1.01667	10.5867	7.755	7.22833	11.475	17.4667	5.30333
GMP	maker-Fvb7-1-augustus-gene-253.36	41.81	37.6117	16.6117	19.8917	65.155	33.3017	27.3617	26.4633	42.43	48.3333
	maker-Fvb7-2-augustus-gene-232.50	9.31167	5.88833	1.87667	2.66	30.3783	16.735	9.49667	6.49833	10.7333	6.16333
	maker-Fvb7-2-augustus-gene-235.55	5.89	4.62667	1.795	2.68667	20.6117	8.40667	4.505	3.83	7.3	3.54667
	maker-Fvb7-3-augustus-gene-68.63	111.008	482.768	134.285	210.228	47.2367	21.51	22.4433	31.55	34.1	38.0733
	maker-Fvb7-4-augustus-gene-53.49	13.72	4.465	2.33333	2.57833	33.8583	17.27	11.9067	10.345	16.7633	9
GME	maker-Fvb6-1-augustus-gene-343.61	195.085	6.21833	3.55167	13.9517	247.765	73.3383	37.6917	27.1817	199.1	18.9133
	augustus_masked-Fvb6-2-processed-gene-258.15	74.7667	1.69667	0.906667	2.17333	239.617	113.987	44.7783	34.585	96.5133	3.17
	augustus_masked-Fvb6-3-processed-gene-402.21	17.0083	0.736667	0.266667	1.25	13.18	7.88167	4.875	2.81833	32.9167	2.5
	augustus_masked-Fvb6-3-processed-gene-407.10	8.31	1.00167	0.303333	0.618333	9.48667	7.13667	4.705	3.15333	15.1767	1.07333
	maker-Fvb6-4-snap-gene-36.64	118.983	4.075	5.19167	12.0833	246.228	57.4283	23.1883	9.84833	105.193	10.6167
GGP	snap_masked-Fvb3-1-processed-gene-167.12	32.9783	4.23	3.50167	5.99833	57.985	118.885	114.348	74.6317	137.247	36.32
	maker-Fvb3-3-augustus-gene-128.36	26.665	2.005	1.83333	3.72667	30.3617	68.195	84.6983	54.3367	58.4933	21.26
	maker-Fvb3-4-augustus-gene-163.49	33.435	3.65	3.25	5.09333	66.3117	156.342	120.582	45.3517	82.0133	15.37
	maker-Fvb4-1-augustus-gene-150.38	30.255	3.36167	2.41333	3.44333	44.0433	39.81	16.8617	6.93833	89.2867	17.2667
	maker-Fvb4-3-augustus-gene-53.53	5.97833	0.501667	0.298333	0.32	5.825	3.84	1.49833	0.39	13.7833	2.56
	maker-Fvb4-3-augustus-gene-80.44	7.72167	0.725	0.67	0.766667	10.7333	10.4083	4.86667	2.00167	30.99	6.01333
	maker-Fvb4-4-augustus-gene-49.36	38.485	1.25333	1.415	2.33	27.5033	50.4167	30.9917	12.9217	70.5467	18.7067
	augustus_masked-Fvb7-1-processed-gene-120.7	0	0.0833333	0	0	0	0	0	0	0	0
	augustus_masked-Fvb7-1-processed-gene-166.6	0	0	0	0	0	0	0	0	0	0
	augustus_masked-Fvb7-2-processed-gene-111.6	0	0	0	0	0	0	0	0	0	0
	augustus_masked-Fvb7-2-processed-gene-175.7	0	0.11	0	0	0	0	0	0	0	0
	augustus_masked-Fvb7-3-processed-gene-123.10	0	0	0	0	0	0	0	0	0	0
GPP	augustus_masked-Fvb3-1-processed-gene-315.8	33.235	13.3633	11.6067	14.2183	55.4783	121.248	126.8	126.987	18.04	33.3867
	maker-Fvb3-2-augustus-gene-28.51	30.625	16.9483	14.1067	14.7933	39.5917	61.1467	60.525	53.0267	20.44	32.11
	snap_masked-Fvb3-2-processed-gene-32.39	12.1967	0.565	0.4	0.906667	23.72	15.1917	6.79333	3.26167	7.99333	0.85
GalDH	maker-Fvb2-1-augustus-gene-7.38	11.56	3.595	1.44667	1.80667	9.28833	7.76833	5.695	7.18333	14.5367	4.4
	maker-Fvb2-2-augustus-gene-219.47	14.2817	5.22	1.58667	2.01	26.7767	19.875	11.85	7.91	20.5	7.43
	snap_masked-Fvb2-3-processed-gene-222.21	9.23333	2.82	0.446667	0.675	8.71833	11.8483	8.37	9.225	20.1833	2.43333
	maker-Fvb2-4-augustus-gene-9.45	11.105	3.99167	1.20833	1.76333	9.55833	5.76667	4.28333	3.29	10.6433	4.29333
GalLDH	maker-Fvb6-1-augustus-gene-182.38	7.09833	1.96	0.838333	1.58333	9.12167	14.6617	13.4717	12.4233	9.76667	3.97667
	maker-Fvb6-2-snap-gene-104.40	1.33167	0.451667	0.198333	0.655	1.03167	1.11333	0.495	0.785	2.6	1.05667
	maker-Fvb6-3-augustus-gene-192.31	11.2083	5.13333	2.26167	4.74167	9.99333	11.955	11.315	13.3067	12.42	5.52
	maker-Fvb6-4-augustus-gene-184.28	9.08667	3.30667	1.58167	5.04833	9.975	12.85	10.7867	13.47	12.1067	5.08333
GalUR	maker-Fvb4-1-augustus-gene-196.31	1.68833	2.18667	3.16333	16.6083	21.2183	189.793	724.77	1136.74	6.97	1.03
	maker-Fvb4-2-snap-gene-8.66	0.131667	0.203333	0.313333	0.476667	0.641667	10.1167	18.59	31.3283	1.94	6.11
	maker-Fvb4-3-augustus-gene-8.39	3.70167	1.32833	4.325	2.50833	3.195	15.795	31.7317	43.6117	4.08	24.2267
	maker-Fvb4-4-snap-gene-10.69	1	0.225	1.31333	1.7	0.818333	8.77167	14.4483	22.5883	7.36	6.21333
MIOX	maker-Fvb1-2-augustus-gene-12.47	0.818333	0.0233333	0.03	0.0733333	29.8733	8.995	0.508333	0.045	1.86667	10.71
	maker-Fvb1-2-augustus-gene-24.67	0.768333	0	0.478333	0.153333	23.4983	6.3	0.24	0	1.19333	6.78333
	maker-Fvb1-3-augustus-gene-30.62	1.98167	0.238333	1.29667	0.72	126.212	39.9983	1.85167	0.298333	8.01667	37.8133
	maker-Fvb1-4-augustus-gene-28.56	4.94	0.626667	1.34167	0.681667	165.678	58.81	4.06667	0.296667	10.46	36.24
	maker-Fvb4-1-augustus-gene-199.63	0.281667	1.245	0.58	0.43	0.743333	0.923333	0.17	0.3	1.65	0.273333
	maker-Fvb4-2-augustus-gene-5.53	0.458333	5.59333	4.12167	3.63833	13.76	12.0383	2.63	2.79167	6.03333	3.92333
	maker-Fvb4-3-snap-gene-4.66	9.90333	18.2017	9.81167	10.195	15.5067	23.0783	7.935	14.535	11.2633	19.98
	maker-Fvb4-4-snap-gene-7.46	0.233333	0.891667	0.663333	0.628333	3.58667	4.67	0.316667	0.141667	1.72667	0.23
	maker-Fvb5-1-augustus-gene-10.58	0.00666667	0	0.0183333	0	0.101667	0	0.02	0	0.0333333	0.05
	maker-Fvb5-1-augustus-gene-129.56	0.181667	0.0133333	0	0.0333333	0	0	0	0.0183333	0	0.02
	maker-Fvb5-2-augustus-gene-120.44	0.195	0	0	0	0.015	0	0	0	0	0
	maker-Fvb5-3-snap-gene-160.61	0	0	0	0	0	0	0	0.03	0.13	0
	maker-Fvb5-3-augustus-gene-264.47	0.103333	0.0233333	0.176667	0.136667	1.59	1.44667	5.03833	22.3983	0.05	1.31333
	maker-Fvb5-4-augustus-gene-100.46	0.105	0.0783333	0	0	0	0	0	0	0	0
	maker-Fvb6-3-augustus-gene-125.32	26.8233	16.1617	23.855	57.4133	3.59833	4.05333	0.358333	0.193333	11.58	33.69
	maker-Fvb6-4-augustus-gene-246.21	18.215	48.615	51.0283	75.7717	2.34333	0.51	0.065	0.155	6.16333	42.32
AO	maker-Fvb1-1-augustus-gene-146.25	12.8033	0.123333	0.17	0.181667	0.386667	0.0266667	0.0383333	0.01	0.0733333	26.82
	maker-Fvb1-3-augustus-gene-140.22	2.815	0.0983333	0.753333	0.235	2.22667	0.0983333	0.065	0.0883333	0.41	73.51
	maker-Fvb3-1-snap-gene-238.36	0.453333	0.678333	0.728333	0.095	0.165	0.196667	0.075	0.0666667	0.0133333	0.466667
	maker-Fvb3-2-snap-gene-79.38	0.095	0.0116667	0	0	0.153333	0.173333	0.0466667	0.0383333	0	0.06
	maker-Fvb3-4-snap-gene-223.48	0.52	0.136667	0.143333	0.0633333	1.25833	1.21833	0.42	0.316667	0	0.143333
	maker-Fvb5-1-augustus-gene-217.42	7.26833	0.0483333	0.0766667	0.0266667	11.655	6.765	1.79833	0.53	40.54	4.11333
	maker-Fvb5-2-augustus-gene-185.30	2.52	0.09	0.025	0.0366667	12.7017	4.50667	1.25667	0.301667	20.7167	0.83
	maker-Fvb5-3-snap-gene-89.30	2.925	0.0533333	0.01	0	1.86667	0.78	0.228333	0.06	5.86667	0.673333
	maker-Fvb5-4-augustus-gene-174.27	2.475	0.125	0.0383333	0.0366667	2.515	1.76833	0.743333	0.196667	15.2033	2.41333
APX	maker-Fvb1-1-augustus-gene-220.43	14.9617	8.30667	6.60833	5.91167	7.59	6.26667	3.58167	1.24167	34.2167	10.4
	maker-Fvb1-2-augustus-gene-76.37	9.54833	5.61667	5.995	5.87333	7.00167	4.14667	1.62667	0.653333	15.0733	9.3
	maker-Fvb1-3-snap-gene-62.50	7.45	6.23	5.85667	5.74167	5.10833	2.81833	1.42167	0.435	18.0533	7.56
	maker-Fvb1-4-augustus-gene-54.45	11.5417	4.74333	4.21333	5.51333	5.61333	3.53167	1.6	0.585	20.2833	4.91333
	maker-Fvb2-1-snap-gene-2.42	21.51	15.0517	4.82667	5.205	13.85	12.7317	12.36	14.9267	9.52667	19.9033
	maker-Fvb2-2-augustus-gene-224.51	35.7267	14.11	3.17333	4.555	21.355	21.1417	19.6883	24.1167	26.8033	18.8033
	augustus_masked-Fvb2-3-processed-gene-229.7	32.6817	20.4317	6.5	8.67	19.1717	19.725	20.4333	26.2517	9.29	24.4033
	maker-Fvb2-4-augustus-gene-3.19	22.1783	12.6333	6.08667	5.605	12.365	12.395	11.1	14.3917	16.5767	36.43
	maker-Fvb3-1-augustus-gene-75.28	241.882	72.8467	22.965	33.5283	255.33	264.328	183.787	202.762	78.0433	95.9967
	maker-Fvb3-2-snap-gene-238.38	362.712	125.01	35.805	55.4583	322.618	319.488	219.543	283.788	152.743	273.607
	maker-Fvb3-3-augustus-gene-221.30	489.16	151.362	45.5783	65.9017	469.742	410.753	281.832	304.45	209.19	264.14
	maker-Fvb3-4-augustus-gene-78.39	509.675	261.493	75.7217	114.292	563.79	555.442	625.005	956.957	225.847	439.83
	maker-Fvb6-1-snap-gene-261.45	0.166667	1.865	1.44167	5.12833	1.40167	5.23833	40.7567	87.1233	1.25667	2.95667
	maker-Fvb6-2-augustus-gene-182.35	8.90833	15.1017	6.05333	8.75167	7.91833	25.8033	48.015	75.905	3.44	6.53667
	maker-Fvb6-4-snap-gene-106.49	0.333333	0	0	0.161667	0.145	0.778333	11.4083	43.9883	0.176667	1.28667
	maker-Fvb5-3-augustus-gene-29.28	9.11667	0.936667	1.71667	3.975	7.16667	2.77	2.04667	3.79	96.2667	2.96
	augustus_masked-Fvb5-4-processed-gene-226.1	0.703333	0.201667	0.075	0.0516667	0.361667	0.466667	0.255	0.346667	7.3	0.286667
	augustus_masked-Fvb2-1-processed-gene-192.1	0.196667	0.0133333	0.0183333	0.095	0.05	0.0816667	0	0	1.60333	0
	maker-Fvb2-2-augustus-gene-28.37	2.69333	0.846667	0.901667	1.65	1.55833	0.735	0.346667	0.301667	13.8233	0.706667
	snap_masked-Fvb2-4-processed-gene-205.27	3.83333	1.02667	0.49	1.48333	2.02167	1.25667	0.678333	0.325	14.2167	0.513333
	snap_masked-Fvb2-1-processed-gene-178.13	17.3233	0.488333	0.323333	1.62833	38.5417	43.1733	23.6617	9.70167	43.2767	11.6367
	maker-Fvb2-2-augustus-gene-37.43	13.5167	1.39167	1.125	2.82833	26.5717	35.87	30.4083	27.745	19.57	11.3433
	snap_masked-Fvb2-3-processed-gene-20.42	9.84	6.43	4.86333	9.805	16.415	21.06	15.2417	14.7767	23.0533	7.36
	maker-Fvb2-4-augustus-gene-197.46	10.66	1.775	2.13667	4.50167	23.89	25.505	14.98	9.15833	29.2867	7.13667
DHAR	maker-Fvb1-1-snap-gene-29.22	19.3983	9.205	8.60333	13.4	39.5583	26.375	14.6717	10.8233	109.13	5.67
	snap_masked-Fvb1-4-processed-gene-214.15	10.6533	3.78333	3.845	6.88167	16.41	7.42833	4.43667	2.54	48.2933	2.17667
	maker-Fvb7-1-augustus-gene-241.44	192.925	84.0717	24.2833	20.8983	271.09	123.95	48.435	22.8033	249.25	66.9433
	maker-Fvb7-1-snap-gene-247.79	0.31	0.21	0.0583333	0.04	0.253333	0.463333	0.228333	0.291667	0.75	0.0266667
	maker-Fvb7-2-augustus-gene-215.48	4.43833	3.53333	0.5	1.14833	8.025	4.94833	1.74	0.83	38.57	3.53
	maker-Fvb7-2-augustus-gene-298.69	1.15167	0.423333	0.301667	0.191667	0.971667	1.03833	0.39	1.085	2.33667	0.316667
	maker-Fvb7-3-augustus-gene-82.59	76.025	32.2917	8.975	10.7267	105.558	65.1367	29.8167	11.285	193.067	48.6333
	maker-Fvb7-4-augustus-gene-69.34	0.0483333	0	0.0183333	0	0.126667	0.03	0.0233333	0.0133333	0.0366667	0
	maker-Fvb7-2-snap-gene-222.65	0.015	0	0	0	0	0	0	0	0	0
	maker-Fvb7-2-snap-gene-222.66	0	0	0	0	0	0.035	0.025	0	0.106667	0
	snap_masked-Fvb7-4-processed-gene-69.24	0.0533333	0	0	0	0.0183333	0.0183333	0	0	0.403333	0
	maker-Fvb7-4-snap-gene-78.59	2.38	0.97	0.693333	0.373333	3.81667	2.52333	1.395	0.34	11.49	1.75667
MDHAR	maker-Fvb3-1-snap-gene-195.35	5.355	4.835	4.885	3.66	6.42833	6.885	6.30167	6.45167	4.47667	9.07
	maker-Fvb3-2-snap-gene-123.62	5.93	4.175	1.74333	1.63	8.295	7.50833	6.74167	4.97833	4.69	10.0033
	snap_masked-Fvb3-3-processed-gene-108.6	0.103333	0.0116667	0.0266667	0.06	0.293333	0.195	0.0333333	0.0516667	0.33	0.196667
	maker-Fvb3-4-snap-gene-181.50	0.231667	0	0.0266667	0.0233333	2.42333	0.615	0.125	0.025	0.893333	0.556667
	maker-Fvb5-1-augustus-gene-17.40	16.995	15.8533	11.7433	16.9817	14.8917	14.195	12.5317	11.7083	10.8933	13.9467
	maker-Fvb5-2-augustus-gene-16.34	9.56333	1.82	1.38167	3.73667	9.81167	11.2133	8.97833	6.895	8.42	12.6333
	augustus_masked-Fvb5-3-processed-gene-257.1	4.64333	1.07333	0.735	0.955	5.24833	5.96667	4.28167	3.49833	3.38333	3.31667
	snap_masked-Fvb5-4-processed-gene-16.18	2.98667	1.10667	0.928333	1.54667	1.13167	1.845	1.38667	1.29833	1.95667	1.80333
	maker-Fvb6-1-augustus-gene-23.39	11.2717	6.47667	9.17833	6.83833	16.415	50.9817	59.7967	36.6267	27.2233	7.23667
	maker-Fvb6-1-augustus-gene-239.32	85.8367	20.865	11.0933	30.44	84.8717	123.15	143.875	210.153	70.82	51.6967
	snap_masked-Fvb6-2-processed-gene-289.21	7.82333	4.42667	5.13	6.41167	6.14	9.04667	8.97833	8.295	20.4233	3.99333
	maker-Fvb6-3-augustus-gene-20.23	4.28333	1.87	3.80333	3.14833	3.46667	8.235	6.08333	5.05	21	1.82
	maker-Fvb6-3-augustus-gene-273.47	25.1167	5.085	2.56167	7.72333	33.2317	44.4683	38.1767	61.6333	10.0733	16.5267
	maker-Fvb6-3-augustus-gene-282.27	17.3867	6.23167	2.30667	5.495	18.5983	27.62	30.2667	42.4833	18.3333	15.5367
	maker-Fvb6-4-augustus-gene-6.43	5.485	0.91	1.61	1.75833	3.365	5.07333	5.46333	4.96333	16.8967	2.99667
	maker-Fvb6-4-augustus-gene-127.27	92.6533	33.84	19.5883	41.155	94.43	141.458	168.11	223.493	60.4933	55.32
