# Supplementary material for: Genome-Wide Analysis of Ascorbic Acid Metabolism Related Genes in Fragaria × ananassa and Its Expression Pattern Analysis in Strawberry Fruits
Source: Front Plant Sci. 2022 Jul 6;13:954505. doi: 10.3389/fpls.2022.954505 (PMC9296770; doi:10.3389/fpls.2022.954505)
Supplement: Supplementary file 3 [file Table_3.XLSX]

## Sheet: Sheet1
Supplementary Table 3 The expression level of ascorbic acid metabolism related genes in response to plant hormone treatment in octoploid strawberry ‘Toyonoka’. CK, ABA and NDGA represents control, abscisic acid and nordihydroguaiaretic acid-treated fruits, respectively. The number in the sample name means days after the treatment.
Gene name	Gene locus	Expression level (TPM)
		CK0	CK5	CK8	ABA5	ABA8	NDGA5	NDGA8
PMI	maker-Fvb4-1-snap-gene-149.43	14.315	18.18	18.92	17.875	15.955	16.255	18.505
	maker-Fvb4-2-augustus-gene-52.34	11.175	5.395	5.6	3.62	3.56	5.955	8.78
	maker-Fvb4-3-augustus-gene-54.52	2.225	0.455	0.825	0.385	0.17	0.555	0.595
	maker-Fvb4-3-augustus-gene-82.40	1	0.85	0.56	0.875	0.605	0.915	1.045
	maker-Fvb4-4-snap-gene-50.64	10.2	11.17	10.71	11.24	12.88	8.315	12.7
	maker-Fvb5-1-augustus-gene-134.53	3.685	4.71	5.93	3.92	1.195	4.715	3.205
	maker-Fvb5-3-augustus-gene-155.47	2.435	3.27	4.6	2.595	1.505	1.6	1.525
PMM	maker-Fvb7-1-augustus-gene-168.38	7.03	8.21	5.835	5.985	4.3	8.245	9.58
	maker-Fvb7-2-augustus-gene-113.48	4.845	10.4	5.925	7.75	4.97	7.205	11.275
	maker-Fvb7-2-snap-gene-178.60	2.995	1	4.24	0.86	1.015	2.32	1.615
	maker-Fvb7-4-augustus-gene-116.48	16.345	12.705	22.455	11.55	8.525	16.69	16.875
GMP	maker-Fvb7-1-augustus-gene-253.36	20.445	19.06	17.295	14.405	17.11	14.375	13.015
	maker-Fvb7-2-augustus-gene-232.50	20.565	14.565	17.715	10.025	6.35	17.175	11.66
	maker-Fvb7-2-augustus-gene-235.55	2.015	4.37	2.16	3.465	2.855	4.155	3.485
	maker-Fvb7-3-augustus-gene-68.63	7.755	19.705	13.105	13.075	11.11	15.055	7.525
	maker-Fvb7-4-augustus-gene-53.49	14.38	17.555	15.665	13.39	8.685	15.215	12.445
GME	maker-Fvb6-1-augustus-gene-343.61	59.065	28.97	38.49	24.17	15.315	39.23	35.265
	augustus_masked-Fvb6-2-processed-gene-258.15	89.805	78.94	72.905	47.58	19.905	96.505	82.72
	augustus_masked-Fvb6-3-processed-gene-402.21	7.815	4.35	4.88	3.02	1.97	5.87	5.68
	augustus_masked-Fvb6-3-processed-gene-407.10	11.94	5.155	7.27	4.02	2.46	7.48	6.39
	maker-Fvb6-4-snap-gene-36.64	62.19	20.445	26.435	14.14	7.415	29.52	24.43
GGP	snap_masked-Fvb3-1-processed-gene-167.12	59.72	59.23	47.465	57.095	29.91	58.955	51.565
	maker-Fvb3-3-augustus-gene-128.36	44.77	41.325	72.46	44.245	30.355	44.515	46.04
	maker-Fvb3-4-augustus-gene-163.49	79.76	67.435	89.165	57.305	24.045	93.03	56.82
	maker-Fvb4-1-augustus-gene-150.38	36.985	9.36	22.635	8.14	5.705	19.285	16.29
	maker-Fvb4-3-augustus-gene-53.53	4.865	1.755	3.22	1.69	0.69	3.11	2.21
	maker-Fvb4-3-augustus-gene-80.44	24.31	12.425	15.545	8.48	3.98	16.035	16.24
	maker-Fvb4-4-augustus-gene-49.36	55.065	39.665	49.38	35.545	19.975	47.9	47.165
	augustus_masked-Fvb7-1-processed-gene-120.7	0	0	0	0	0	0	0
	augustus_masked-Fvb7-1-processed-gene-166.6	0	0	0	0	0	0	0
	augustus_masked-Fvb7-2-processed-gene-111.6	0	0	0	0.025	0	0	0
	augustus_masked-Fvb7-2-processed-gene-175.7	0.025	0	0	0	0	0	0
	augustus_masked-Fvb7-3-processed-gene-123.10	0	0	0	0	0	0	0
GPP	augustus_masked-Fvb3-1-processed-gene-315.8	83.765	92.935	140.07	101.005	66.88	101.54	88.595
	maker-Fvb3-2-augustus-gene-28.51	58.305	54.83	53.38	56.955	33.075	50.79	51.735
	snap_masked-Fvb3-2-processed-gene-32.39	19.935	9.095	10.33	9.08	2.975	12.4	11.04
GalDH	maker-Fvb2-1-augustus-gene-7.38	6.415	5.755	9.07	5.085	5.135	7.52	9.585
	maker-Fvb2-2-augustus-gene-219.47	18.54	11.7	12.25	10.215	6.2	16.305	18.43
	snap_masked-Fvb2-3-processed-gene-222.21	10.795	9.845	11.715	7.82	7.505	10.215	13.735
	maker-Fvb2-4-augustus-gene-9.45	22.57	12.535	14.93	10.715	6.985	14.605	15.135
GalLDH	maker-Fvb6-1-augustus-gene-182.38	14.26	13.175	13.535	11.15	9.215	12.93	13.705
	maker-Fvb6-2-snap-gene-104.40	7.105	6.355	9.09	5.845	4.305	6.405	8.025
	maker-Fvb6-3-augustus-gene-192.31	10.895	9.34	12.745	8.555	7.655	9.25	13.455
	maker-Fvb6-4-augustus-gene-184.28	8.26	6.95	10.99	6.72	5.205	8.125	9.725
GalUR	maker-Fvb4-1-augustus-gene-196.31	348.325	256.79	477.415	312.63	181.8	205.75	203.985
	maker-Fvb4-2-snap-gene-8.66	1.84	10.395	2.09	13.59	8.25	3.77	5.565
	maker-Fvb4-3-augustus-gene-8.39	2.985	15.76	2.035	19.69	9.665	7.365	7.265
	maker-Fvb4-4-snap-gene-10.69	4.605	11.695	4.94	19.61	9.485	6.39	9.99
MIOX	maker-Fvb1-2-augustus-gene-12.47	0.43	16.565	7.635	0.89	0.135	24.225	7.41
	maker-Fvb1-2-augustus-gene-24.67	0.585	9.44	3.375	0.435	0.055	15.905	4.24
	maker-Fvb1-3-augustus-gene-30.62	4.29	97.945	24.045	5.83	0.34	141.115	32.265
	maker-Fvb1-4-augustus-gene-28.56	4.11	79.665	29.9	5.845	0.405	130.065	32.16
	maker-Fvb4-1-augustus-gene-199.63	4.165	4.635	3.45	2.48	0.965	6.795	4.095
	maker-Fvb4-2-augustus-gene-5.53	22.315	11.675	11.39	6.095	2.24	21.63	13.645
	maker-Fvb4-3-snap-gene-4.66	14.49	32.645	15.195	15.805	8.06	41.46	13.59
	maker-Fvb4-4-snap-gene-7.46	6.575	3.875	1.885	0.96	1.055	9.125	2.2
	maker-Fvb5-1-augustus-gene-10.58	0	0.01	0	0	0	0	0.025
	maker-Fvb5-1-augustus-gene-129.56	0	0	0.04	0	0	0.19	0
	maker-Fvb5-2-augustus-gene-120.44	0	0.025	0.145	0.045	0.1	0.12	0.065
	maker-Fvb5-3-snap-gene-160.61	0.19	0.135	0.155	0.075	0.1	0.315	0.21
	maker-Fvb5-3-augustus-gene-264.47	0.18	2.49	0.815	2.76	0.25	2.445	0.09
	maker-Fvb5-4-augustus-gene-100.46	0.08	0	0	0	0.025	0.165	0
	maker-Fvb6-3-augustus-gene-125.32	3.605	10.745	3.54	2.565	0.19	9.825	4.135
	maker-Fvb6-4-augustus-gene-246.21	1.375	3.84	1.465	0.83	0.165	4.77	1.25
AO	maker-Fvb1-1-augustus-gene-146.25	0.125	0.015	0.31	0	0.015	0.09	0.05
	maker-Fvb1-3-augustus-gene-140.22	0.055	0.03	0.03	0	0	0.075	0.015
	maker-Fvb3-1-snap-gene-238.36	1.135	0.265	0.725	0.195	0.03	1.025	0.445
	maker-Fvb3-2-snap-gene-79.38	0.22	0.11	0.05	0.17	0.065	0.29	0.02
	maker-Fvb3-4-snap-gene-223.48	2.44	2.19	1.365	1.56	1.055	2.16	1.345
	maker-Fvb5-1-augustus-gene-217.42	8.14	9.895	7.905	5.625	4.14	11.77	11.925
	maker-Fvb5-2-augustus-gene-185.30	5.915	6.925	5.105	4.155	4.73	7.225	9.975
	maker-Fvb5-3-snap-gene-89.30	4.285	3.325	1.96	1.83	1.3	3.68	4.635
	maker-Fvb5-4-augustus-gene-174.27	5.36	2.075	4.38	1.14	1.01	3.55	2.4
APX	maker-Fvb1-1-augustus-gene-220.43	6.65	3.455	3.6	3.805	2.3	4.835	4.635
	maker-Fvb1-2-augustus-gene-76.37	4.22	2.57	2.625	2.08	1.26	3.195	3.255
	maker-Fvb1-3-snap-gene-62.50	4.17	1.76	2.075	2.04	1.055	3.11	2.385
	maker-Fvb1-4-augustus-gene-54.45	5.3	3.895	3.035	3.235	2.075	4.515	3.78
	maker-Fvb2-1-snap-gene-2.42	24.58	11.14	28.685	12.115	11.77	17.125	17.27
	maker-Fvb2-2-augustus-gene-224.51	29.08	25.74	37.5	24.365	24.38	28.705	36.375
	augustus_masked-Fvb2-3-processed-gene-229.7	24.44	21.99	32.19	18.805	22.18	21.895	31.21
	maker-Fvb2-4-augustus-gene-3.19	15.33	15.22	22.225	13.955	14.05	16.205	20.175
	maker-Fvb3-1-augustus-gene-75.28	298.035	259.445	287.53	230.72	255.35	305.295	359.82
	maker-Fvb3-2-snap-gene-238.38	239.12	245.625	277.075	272.41	419.995	246.365	362.74
	maker-Fvb3-3-augustus-gene-221.30	458.61	503.975	539.85	501.49	678.645	525.925	721.18
	maker-Fvb3-4-augustus-gene-78.39	719.43	664.49	1005.93	781.075	1411.81	777.655	919.64
	maker-Fvb6-1-snap-gene-261.45	16.87	12.735	28.625	58.54	133.28	53.485	21.215
	maker-Fvb6-2-augustus-gene-182.35	46.775	51.805	59.08	94.035	209.54	88.8	63.15
	maker-Fvb6-4-snap-gene-106.49	1.835	1.46	7.13	8.4	12.225	3.375	2.365
	maker-Fvb5-3-augustus-gene-29.28	15.95	2.625	6.19	3	2.5	3.745	3.04
	augustus_masked-Fvb5-4-processed-gene-226.1	0.895	1.07	1.065	1.115	0.82	0.665	0.94
	augustus_masked-Fvb2-1-processed-gene-192.1	0.165	0	0.065	0.075	0	0.04	0.105
	maker-Fvb2-2-augustus-gene-28.37	1.63	0.325	0.625	0.63	0.24	0.825	0.78
	snap_masked-Fvb2-4-processed-gene-205.27	1.73	0.75	1.045	0.71	0.25	1.075	1.235
	snap_masked-Fvb2-1-processed-gene-178.13	41.83	28.875	32.79	25.225	17.425	34.64	42.83
	maker-Fvb2-2-augustus-gene-37.43	45.73	25.005	36.23	23.72	18.495	36.57	29.68
	snap_masked-Fvb2-3-processed-gene-20.42	31.465	20.245	23.265	17.955	14.745	26.42	25.18
	maker-Fvb2-4-augustus-gene-197.46	37.735	22.515	21.675	20.29	15.325	30.225	30.92
DHAR	maker-Fvb1-1-snap-gene-29.22	29.035	23.74	20.8	18.59	10.795	26.705	27.84
	snap_masked-Fvb1-4-processed-gene-214.15	9.21	5.305	7.195	4.685	3.625	7.19	8.24
	maker-Fvb7-1-augustus-gene-241.44	87.54	45.705	55.315	53.27	34.36	79.475	73.4
	maker-Fvb7-1-snap-gene-247.79	0.68	0.76	0.7	0.605	0.355	0.785	0.715
	maker-Fvb7-2-augustus-gene-215.48	29.19	18.865	16.55	20.345	14.705	28.43	27.37
	maker-Fvb7-2-augustus-gene-298.69	1.48	2.4	0.86	2.03	2.52	1.74	2.305
	maker-Fvb7-3-augustus-gene-82.59	76.685	56.935	50.695	58.655	40.28	72.235	75.91
	maker-Fvb7-4-augustus-gene-69.34	0.07	0.055	0.18	0.23	0.18	0.085	0.165
	maker-Fvb7-2-snap-gene-222.65	0	0	0.02	0.02	0.04	0	0.04
	maker-Fvb7-2-snap-gene-222.66	0.115	0.085	0.04	0.03	0.035	0.075	0.1
	snap_masked-Fvb7-4-processed-gene-69.24	0.28	0.035	0.215	0.295	0.03	0.175	0.205
	maker-Fvb7-4-snap-gene-78.59	0.83	0.43	1.945	0.47	0.25	0.48	0.72
MDHAR	maker-Fvb3-1-snap-gene-195.35	5.725	8.3	8.515	9.295	9.985	6.815	9.75
	maker-Fvb3-2-snap-gene-123.62	6.19	7.915	8.69	9.21	7.955	7.665	6.99
	snap_masked-Fvb3-3-processed-gene-108.6	0.765	0.43	0.555	0.365	0.145	0.68	0.68
	maker-Fvb3-4-snap-gene-181.50	2.42	1.84	1.555	1.935	0.76	2.355	2.03
	maker-Fvb5-1-augustus-gene-17.40	22.385	11.18	9.66	9.715	4.72	12.815	10.595
	maker-Fvb5-2-augustus-gene-16.34	19.435	14.775	10.745	14.95	8.525	14.645	14.795
	augustus_masked-Fvb5-3-processed-gene-257.1	12.635	8.235	6.635	6.71	3.075	9.365	7.345
	snap_masked-Fvb5-4-processed-gene-16.18	5.08	1.93	2.27	1.615	0.845	2.765	2.275
	maker-Fvb6-1-augustus-gene-23.39	13.285	31.86	34.205	30.445	22.185	17.48	23.84
	maker-Fvb6-1-augustus-gene-239.32	91.28	95.755	89.8	91.12	76.445	92.325	86.57
	snap_masked-Fvb6-2-processed-gene-289.21	7.945	10.195	10.895	10.855	7.495	7.48	9.445
	maker-Fvb6-3-augustus-gene-20.23	5.66	5.17	6.175	4.35	1.715	5.025	4.535
	maker-Fvb6-3-augustus-gene-273.47	38.21	1.025	28.82	1.065	1.065	20.245	7.89
	maker-Fvb6-3-augustus-gene-282.27	21.07	52.045	17.42	43.8	37.095	32.86	37.245
	maker-Fvb6-4-augustus-gene-6.43	6.08	6.43	9.4	7.43	5.73	4.81	6.135
	maker-Fvb6-4-augustus-gene-127.27	130.395	143.265	128.07	137.985	124.34	130.075	120.795
