# Supplementary material for: Genome-Wide Analysis of Ascorbic Acid Metabolism Related Genes in Fragaria × ananassa and Its Expression Pattern Analysis in Strawberry Fruits
Source: Front Plant Sci. 2022 Jul 6;13:954505. doi: 10.3389/fpls.2022.954505 (PMC9296770; doi:10.3389/fpls.2022.954505)
Supplement: Supplementary file 4 [file Table_4.XLSX]

## Sheet: Sheet1
Supplementary Table 4 The information of aldo-keto reductase (AKR) gene family in octoploid strawberry and woodland strawberry.
Species	Gene name	Gene locus	Chromosome no.	Genome location Star	Genome location End	Exon number	Hmmsearch e-value	CDS length (bp)	Prontein length (aa)	pI	GRAVY	MW (kDa)
Octoploid strawberry (Fragaria × ananassa)	FaAKR1	maker-Fvb2-1-augustus-gene-1.22	Fvb2-1	150439	152186	3	1.1e-53	990	329	5.81	-0.191	36.74
	FaAKR2	maker-Fvb2-1-augustus-gene-7.38	Fvb2-1	770543	774374	5	7.6e-59	1128	375	6.1	-0.099	40.88
	FaAKR3	maker-Fvb2-1-snap-gene-159.62	Fvb2-1	15912679	15924720	15	9.2e-66	1584	527	8.61	-0.224	58.27
	FaAKR4	maker-Fvb2-2-augustus-gene-52.66	Fvb2-2	5269680	5273119	10	4.5e-50	1179	392	6.51	0.056	43.36
	FaAKR5	maker-Fvb2-2-augustus-gene-156.34	Fvb2-2	15609653	15613671	8	1.9e-36	1068	355	8.43	-0.032	40.22
	FaAKR6	maker-Fvb2-2-augustus-gene-219.47	Fvb2-2	21949155	21952966	5	1.2e-57	1143	380	5.69	-0.088	41.54
	FaAKR7	maker-Fvb2-2-augustus-gene-225.38	Fvb2-2	22500075	22502243	3	1e-50	993	330	5.77	-0.25	36.86
	FaAKR8	snap_masked-Fvb2-3-processed-gene-89.22	Fvb2-3	8917628	8920352	9	2.9e-44	1050	349	5.51	-0.111	38.96
	FaAKR9	maker-Fvb2-3-snap-gene-158.34	Fvb2-3	15823367	15827284	6	6.7e-46	921	306	6.32	-0.132	34.22
	FaAKR10	snap_masked-Fvb2-3-processed-gene-222.21	Fvb2-3	22239312	22243196	6	3.8e-54	1020	339	5.47	-0.115	36.97
	FaAKR11	maker-Fvb2-3-augustus-gene-230.24	Fvb2-3	22998252	23000298	3	1.4e-52	993	330	5.29	-0.274	36.85
	FaAKR12	maker-Fvb2-4-augustus-gene-3.21	Fvb2-4	293443	295809	4	1e-50	993	330	5.69	-0.245	36.82
	FaAKR13	maker-Fvb2-4-augustus-gene-9.45	Fvb2-4	968464	978055	5	2.4e-58	960	319	5.22	-0.066	34.63
	FaAKR14	maker-Fvb2-4-snap-gene-78.43	Fvb2-4	7843894	7847508	6	9.1e-47	921	306	6.32	-0.121	34.24
	FaAKR15	maker-Fvb3-2-augustus-gene-103.28	Fvb3-2	10333464	10335375	4	9.3e-53	978	325	5.83	-0.153	36.25
	FaAKR16	snap_masked-Fvb3-2-processed-gene-200.24	Fvb3-2	20023051	20027520	12	3.2e-44	1386	461	8.08	-0.35	52.15
	FaAKR17	maker-Fvb3-3-augustus-gene-102.31	Fvb3-3	10284335	10289349	5	8e-53	978	325	7.08	-0.139	36.23
	FaAKR18	augustus_masked-Fvb3-3-processed-gene-178.6	Fvb3-3	17866140	17870714	9	5.6e-60	1179	392	6.72	-0.292	44.07
	FaAKR19	maker-Fvb3-4-augustus-gene-111.28	Fvb3-4	11120921	11125420	10	4.5e-61	1161	386	7.68	-0.251	43.59
	FaAKR20	maker-Fvb3-4-augustus-gene-186.32	Fvb3-4	18667733	18669863	4	1.8e-53	978	325	5.96	-0.14	36.3
	FaAKR21	maker-Fvb4-1-augustus-gene-24.32	Fvb4-1	2433097	2438237	8	2.6e-69	1236	411	8.06	-0.334	46.29
	FaAKR22	maker-Fvb4-1-augustus-gene-38.23	Fvb4-1	3812534	3816596	4	1.1e-68	1002	333	6.92	-0.318	37.01
	FaAKR23	maker-Fvb4-1-augustus-gene-141.33	Fvb4-1	14146722	14148803	4	1.2e-51	972	323	5.78	-0.217	36.15
	FaAKR24	maker-Fvb4-1-augustus-gene-196.31	Fvb4-1	19647918	19649719	4	1.1e-52	960	319	5.35	-0.152	35.7
	FaAKR25	maker-Fvb4-1-augustus-gene-199.65	Fvb4-1	19924947	19929720	3	1.2e-51	1089	362	6.56	-0.282	39.97
	FaAKR26	maker-Fvb4-2-augustus-gene-5.52	Fvb4-2	515079	519616	3	7.2e-53	1089	362	6.8	-0.301	40.02
	FaAKR27	maker-Fvb4-2-snap-gene-8.66	Fvb4-2	787999	797824	9	2.6e-96	1833	610	5.99	-0.157	68.28
	FaAKR28	maker-Fvb4-2-augustus-gene-60.32	Fvb4-2	6038473	6039557	3	7.6e-49	861	287	5.74	-0.013	31.71
	FaAKR29	maker-Fvb4-2-augustus-gene-211.31	Fvb4-2	21172276	21176507	4	1.1e-68	1002	333	6.47	-0.301	37.01
	FaAKR30	maker-Fvb4-2-augustus-gene-230.22	Fvb4-2	23006239	23011351	8	4.7e-69	1236	411	8.06	-0.31	46.25
	FaAKR31	maker-Fvb4-2-snap-gene-248.40	Fvb4-2	24846782	24849073	7	3.6e-58	1068	355	5.65	-0.164	39.48
	FaAKR32	maker-Fvb4-3-snap-gene-4.66	Fvb4-3	473730	481682	13	3e-51	1992	663	5.3	-0.347	74.72
	FaAKR33	maker-Fvb4-3-augustus-gene-8.39	Fvb4-3	801817	804059	4	2e-42	903	300	5.31	-0.164	33.34
	FaAKR34	maker-Fvb4-3-augustus-gene-8.40	Fvb4-3	814077	815523	3	9.3e-53	981	326	5.63	-0.169	36.49
	FaAKR35	maker-Fvb4-3-augustus-gene-278.15	Fvb4-3	27821765	27825600	4	6.1e-69	1002	333	6.47	-0.325	37.03
	FaAKR36	maker-Fvb4-3-augustus-gene-295.47	Fvb4-3	29528185	29533321	7	9.5e-70	1236	411	8.71	-0.317	46.2
	FaAKR37	maker-Fvb4-3-augustus-gene-310.40	Fvb4-3	31069388	31071689	7	3e-69	1038	345	5.55	-0.148	38.2
	FaAKR38	maker-Fvb4-4-augustus-gene-6.55	Fvb4-4	678931	683722	3	6.5e-53	1089	362	6.8	-0.292	40.05
	FaAKR39	maker-Fvb4-4-snap-gene-10.69	Fvb4-4	997711	1004796	8	8e-105	1902	633	5.71	-0.16	70.54
	FaAKR40	maker-Fvb4-4-snap-gene-59.50	Fvb4-4	5895259	5902485	5	1.5e-48	1821	606	5.75	-0.117	67.71
	FaAKR41	augustus_masked-Fvb4-4-processed-gene-152.13	Fvb4-4	15279760	15284409	6	3.9e-68	1056	351	5.91	-0.306	38.65
	FaAKR42	maker-Fvb4-4-augustus-gene-255.41	Fvb4-4	25576026	25580544	4	8.3e-69	1002	333	6.91	-0.291	36.92
	FaAKR43	maker-Fvb5-1-augustus-gene-110.33	Fvb5-1	10992757	10994201	3	9.4e-49	990	329	6.25	-0.141	36.34
	FaAKR44	maker-Fvb5-2-augustus-gene-103.34	Fvb5-2	10338649	10340761	3	6.5e-48	987	328	6.26	-0.152	36.39
	FaAKR45	maker-Fvb5-3-augustus-gene-178.32	Fvb5-3	17793572	17795452	3	1.5e-49	990	329	6.26	-0.146	36.52
	FaAKR46	augustus_masked-Fvb5-4-processed-gene-82.0	Fvb5-4	8198394	8199495	3	4.4e-31	777	258	9.3	-0.056	28.3
	FaAKR47	maker-Fvb6-1-augustus-gene-85.45	Fvb6-1	8576998	8581122	11	3.6e-57	1311	436	8.87	-0.172	48.15
	FaAKR48	maker-Fvb6-1-snap-gene-274.55	Fvb6-1	27420050	27427450	15	2.7e-93	1932	643	7.88	-0.273	71.79
	FaAKR49	maker-Fvb6-1-augustus-gene-274.43	Fvb6-1	27430036	27432810	8	5.6e-48	948	315	6.2	-0.212	35.32
	FaAKR50	snap_masked-Fvb6-1-processed-gene-274.24	Fvb6-1	27443550	27448245	13	2.7e-46	999	332	6.27	-0.171	37.07
	FaAKR51	maker-Fvb6-1-augustus-gene-274.46	Fvb6-1	27460727	27462927	8	1.3e-46	957	318	5.91	-0.219	35.19
	FaAKR52	snap_masked-Fvb6-1-processed-gene-343.36	Fvb6-1	34313684	34316291	7	1.6e-74	1044	347	5.96	-0.237	38.07
	FaAKR53	augustus_masked-Fvb6-1-processed-gene-343.15	Fvb6-1	34322164	34331968	24	1.4e-149	2100	699	6.36	-0.217	76.92
	FaAKR54	maker-Fvb6-1-augustus-gene-343.59	Fvb6-1	34353552	34357913	12	4.6e-137	1887	628	7.26	-0.242	70.09
	FaAKR55	maker-Fvb6-2-snap-gene-196.46	Fvb6-2	19677096	19679012	7	6.6e-47	1026	341	8.49	-0.275	37.99
	FaAKR56	maker-Fvb6-2-snap-gene-197.49	Fvb6-2	19715700	19722635	14	1.1e-76	1941	646	9.01	-0.189	72.22
	FaAKR57	maker-Fvb6-2-augustus-gene-197.37	Fvb6-2	19734315	19735913	7	8e-40	918	305	5.8	-0.272	34.1
	FaAKR58	maker-Fvb6-2-snap-gene-258.96	Fvb6-2	25760009	25772412	13	2.2e-98	1773	590	8.02	-0.324	65.01
	FaAKR59	maker-Fvb6-2-augustus-gene-356.30	Fvb6-2	35642663	35646494	11	1.7e-48	921	306	9.11	-0.339	33.92
	FaAKR60	maker-Fvb6-3-snap-gene-338.42	Fvb6-3	33828685	33833725	14	1.3e-83	2022	673	8.56	-0.209	74.88
	FaAKR61	maker-Fvb6-3-augustus-gene-338.32	Fvb6-3	33842654	33845381	7	2e-42	1053	350	6.47	-0.222	39.12
	FaAKR62	maker-Fvb6-3-snap-gene-338.48	Fvb6-3	33855893	33870031	25	7.5e-94	2580	859	5.86	-0.269	95.59
	FaAKR63	maker-Fvb6-3-snap-gene-402.99	Fvb6-3	40180405	40202182	39	0	5475	1824	6.4	-0.199	202.69
	FaAKR64	maker-Fvb6-3-snap-gene-406.72	Fvb6-3	40637844	40661176	36	0	5388	1795	7.19	-0.276	200.86
	FaAKR65	maker-Fvb6-3-snap-gene-407.72	Fvb6-3	40715181	40720425	8	2e-75	1077	358	5.82	-0.3	39.68
	FaAKR66	maker-Fvb6-4-snap-gene-36.67	Fvb6-4	3647572	3680265	48	0	5142	1713	5.46	-0.244	189.55
	FaAKR67	augustus_masked-Fvb6-4-processed-gene-94.0	Fvb6-4	9419674	9424205	13	4.4e-85	1704	567	7.61	-0.371	63.14
	FaAKR68	maker-Fvb6-4-augustus-gene-94.25	Fvb6-4	9425793	9428047	7	8e-47	984	327	7.17	-0.174	37.15
	FaAKR69	augustus_masked-Fvb6-4-processed-gene-289.0	Fvb6-4	28889755	28893587	11	1.9e-59	1143	380	7.65	-0.241	41.8
	FaAKR70	maker-Fvb7-1-augustus-gene-274.53	Fvb7-1	27439714	27441542	5	5.7e-48	948	315	5.81	-0.339	35.44
	FaAKR71	maker-Fvb7-1-augustus-gene-288.56	Fvb7-1	28783413	28785260	5	1.8e-48	948	315	5.81	-0.37	35.52
	FaAKR72	maker-Fvb7-1-snap-gene-299.78	Fvb7-1	29957261	29959449	7	1.5e-58	1059	352	9.47	-0.065	39.1
	FaAKR73	maker-Fvb7-1-augustus-gene-315.58	Fvb7-1	31502788	31505017	7	4e-66	1089	362	9.42	-0.131	40.21
	FaAKR74	maker-Fvb7-2-augustus-gene-259.62	Fvb7-2	25909194	25911082	5	3.9e-48	984	327	5.71	-0.317	36.75
	FaAKR75	maker-Fvb7-2-augustus-gene-262.58	Fvb7-2	26267440	26269290	5	2.2e-47	948	315	5.62	-0.35	35.54
	FaAKR76	maker-Fvb7-3-augustus-gene-18.53	Fvb7-3	1858405	1860592	7	1.9e-64	1089	362	9.4	-0.097	40.16
	FaAKR77	maker-Fvb7-3-augustus-gene-43.53	Fvb7-3	4336242	4338084	5	8.2e-47	948	315	6.11	-0.322	35.42
	FaAKR78	augustus_masked-Fvb7-3-processed-gene-44.10	Fvb7-3	4402684	4404514	5	5.3e-40	876	291	5.48	-0.266	32.56
	FaAKR79	maker-Fvb7-4-augustus-gene-7.43	Fvb7-4	777605	779904	7	1.5e-64	1089	362	9.46	-0.123	40.19
	FaAKR80	maker-Fvb7-4-augustus-gene-33.48	Fvb7-4	3354088	3356052	5	8.5e-40	1020	339	6.87	-0.265	38.1
Woodland strawberry (Fragaria vesca)	FvAKR1	FvH4_2g01280	Fvb2	1204566	1205738	4	1.5e-37	1011	336	5.36	-0.137	37.39
	FvAKR2	FvH4_2g02330	Fvb2	1915545	1919398	5	1.5e-58	1143	380	5.82	-0.119	41.59
	FvAKR3	FvH4_2g10630	Fvb2	9393818	9398054	6	2.5e-48	930	309	6.21	-0.144	34.63
	FvAKR4	FvH4_2g24450	Fvb2	19948203	19951558	11	3e-35	774	257	6.66	0.063	28.5
	FvAKR5	FvH4_3g20300	Fvb3	13335652	13337455	4	4.7e-53	981	326	5.83	-0.124	36.39
	FvAKR6	FvH4_3g29620	Fvb3	22621004	22625868	9	1.4e-61	1143	380	8.21	-0.227	42.72
	FvAKR7	FvH4_4g01350	Fvb4	1249499	1252368	7	1.6e-70	1035	344	6.02	-0.184	38.1
	FvAKR8	FvH4_4g01550	Fvb4	1371328	1373851	7	1.6e-69	1038	345	5.55	-0.148	38.21
	FvAKR9	FvH4_4g03680	Fvb4	3263335	3268554	7	2.8e-56	906	301	7.67	-0.299	34.26
	FvAKR10	FvH4_4g05880	Fvb4	5266369	5270607	4	3.5e-69	1002	333	6.47	-0.317	37.01
	FvAKR11	FvH4_4g12490	Fvb4	16157332	16161631	5	7.5e-72	1029	342	6.52	-0.275	37.6
	FvAKR12	FvH4_4g25591	Fvb4	27306847	27307504	2	1.4e-29	576	191	5.33	0.197	20.75
	FvAKR13	FvH4_4g25600	Fvb4	27307614	27308794	3	3e-50	972	323	5.37	-0.228	36.29
	FvAKR14	FvH4_4g25610	Fvb4	27323361	27325749	4	2.6e-50	1035	344	5.22	-0.185	38.71
	FvAKR15	FvH4_4g25612	Fvb4	27333588	27335783	4	7.6e-53	972	323	5.94	-0.204	36.14
	FvAKR16	FvH4_4g25620	Fvb4	27340570	27342973	5	4.4e-32	867	288	7.06	-0.093	32.28
	FvAKR17	FvH4_4g35840	Fvb4	33005482	33007092	3	7.6e-53	981	326	5.4	-0.178	36.56
	FvAKR18	FvH4_4g35841	Fvb4	33011484	33013810	4	9.2e-52	960	319	5.45	-0.169	35.57
	FvAKR19	FvH4_4g36371	Fvb4	33331495	33335274	3	3.9e-52	1089	362	6.76	-0.282	39.99
	FvAKR20	FvH4_5g17890	Fvb5	1721004	1729043	3	2.1e-23	588	195	9.03	-0.326	22.01
	FvAKR21	FvH4_5g17900	Fvb5	10272920	10275308	3	5.7e-49	990	329	6.25	-0.141	36.34
	FvAKR22	FvH4_6g03001	Fvb6	1680437	1683649	7	2.4e-66	1014	337	5.19	-0.19	37.41
	FvAKR23	FvH4_6g03010	Fvb6	1684029	1685937	5	2.3e-76	1053	350	6.47	-0.207	38.72
	FvAKR24	FvH4_6g03050	Fvb6	1705423	1708468	8	1.4e-72	1227	408	6.73	-0.206	45.44
	FvAKR25	FvH4_6g03051	Fvb6	1708732	1712293	7	1.6e-73	1059	352	6.77	-0.192	38.76
	FvAKR26	FvH4_6g03052	Fvb6	1712884	1715146	7	1.8e-73	930	309	6.41	-0.154	33.94
	FvAKR27	FvH4_6g03070	Fvb6	1721004	1729043	7	3.3e-75	1044	347	6.14	-0.28	38.25
	FvAKR28	FvH4_6g03110	Fvb6	1740480	1743492	7	5.4e-76	1044	347	5.97	-0.289	38.4
	FvAKR29	FvH4_6g12990	Fvb6	7879016	7881266	8	6.7e-47	957	318	5.86	-0.22	35.17
	FvAKR30	FvH4_6g13012	Fvb6	7892966	7895644	7	6e-47	876	291	7.73	-0.247	32.28
	FvAKR31	FvH4_6g13020	Fvb6	7895936	7916023	7	5.5e-45	963	320	6.2	-0.18	36.03
	FvAKR32	FvH4_6g13021	Fvb6	7916622	7922238	7	1.2e-47	906	301	6.84	-0.334	33.97
	FvAKR33	FvH4_6g13030	Fvb6	7922414	7924848	7	9.5e-48	948	315	8.17	-0.323	34.88
	FvAKR34	FvH4_6g38930	Fvb6	30788403	30792771	10	1.5e-44	1002	333	9.1	-0.164	37.09
	FvAKR35	FvH4_7g27320	Fvb7	20451628	20453875	5	3.5e-48	948	315	5.71	-0.344	35.49
	FvAKR36	FvH4_7g32560	Fvb7	23393441	23395484	7	5.6e-65	1089	362	9.46	-0.157	40.19
