# Supplementary material for: Genome-Wide Analysis of Ascorbic Acid Metabolism Related Genes in Fragaria × ananassa and Its Expression Pattern Analysis in Strawberry Fruits
Source: Front Plant Sci. 2022 Jul 6;13:954505. doi: 10.3389/fpls.2022.954505 (PMC9296770; doi:10.3389/fpls.2022.954505)
Supplement: Supplementary file 5 [file Table_5.XLSX]

## Sheet: Sheet1
Supplementary Table 5 Numbers of known cis-elements related to plant growth and stress in the promoter regions of FaAKR genes.
Gene name	Gene locus	auxin-responsive element			gibberellin-responsive element			abscisic acid responsiveness	MeJA-responsiveness	salicylic acid responsiveness		anaerobic induction	low-temperature responsiveness	defense and stress responsiveness	drought-inducibility	MYBHv1 binding site	zein metabolism regulation	meristem expression	meristem specific activation	endosperm expression	cell cycle regulation	cis-acting regulatory element root specific	circadian control	seed-specific regulation	differentiation of the palisade mesophyll cells	enhancer-like element involved in anoxic specific inducibility	flavonoid biosynthetic genes regulation	wound-responsive element	endosperm expression	light responsiveness			light responsive element
		TGA-element	TGA-box	AuxRR-core	GARE-motif	P-box	TATC-box	ABRE	CGTCA-motif	SARE	TCA-element	ARE	LTR	TC-rich repeats	MBS	CCAAT-box	O2-site	CAT-box	NON-box	GCN4_motif	MSA-like	motif I	circadian	RY-element	HD-Zip 1	GC-motif	MBSI	WUN-motif	GCN4_motif	G-Box	ACE	MRE	GT1-motif	3-AF1 binding site	Sp1
FaAKR1	maker-Fvb2-1-augustus-gene-1.22						1	2	1			4		1																3
FaAKR2	maker-Fvb2-1-augustus-gene-7.38	2		1	1			2	3					1	1			3												2			2
FaAKR3	maker-Fvb2-1-snap-gene-159.62	1			1	2		1	2			4	1	1		1										1		1		1	1	1
FaAKR4	maker-Fvb2-2-augustus-gene-52.66							2	3					1														1		2					1
FaAKR5	maker-Fvb2-2-augustus-gene-156.34	2										2	1							1									1	1			4
FaAKR6	maker-Fvb2-2-augustus-gene-219.47							3	3			1				1	1	1												3	1
FaAKR7	maker-Fvb2-2-augustus-gene-225.38					1		1	2		1	7	1		2	2		1												1			1
FaAKR8	snap_masked-Fvb2-3-processed-gene-89.22								1		1	4			1					1						1			1						1
FaAKR9	maker-Fvb2-3-snap-gene-158.34	2					2	4	4			2				1	3	1					1							5			1		1
FaAKR10	snap_masked-Fvb2-3-processed-gene-222.21							1		1	1	5																2			1
FaAKR11	maker-Fvb2-3-augustus-gene-230.24							4	6		1	3	2	1																4			3
FaAKR12	maker-Fvb2-4-augustus-gene-3.21			2	1			4	5			1	1	1																8		1	2
FaAKR13	maker-Fvb2-4-augustus-gene-9.45							1				5				1	1											2		3	1		1
FaAKR14	maker-Fvb2-4-snap-gene-78.43	1					1		1		1	4	1	1	1			1												1	1		4		1
FaAKR15	maker-Fvb3-2-augustus-gene-103.28	1						2	1			2		2		1						1								6			1
FaAKR16	snap_masked-Fvb3-2-processed-gene-200.24			1			1		1		1	1	1				1							1
FaAKR17	maker-Fvb3-3-augustus-gene-102.31							1	2			4		1									1											1
FaAKR18	augustus_masked-Fvb3-3-processed-gene-178.6							3	1			2				1	1										1			5				1
FaAKR19	maker-Fvb3-4-augustus-gene-111.28	2						4	5			2	1	1	1	1	2										1			5		3	1
FaAKR20	maker-Fvb3-4-augustus-gene-186.32			1		1		3	6			4		1	1	1	2			1						1		1	1	3		1			1
FaAKR21	maker-Fvb4-1-augustus-gene-24.32											4	1	1	4												1			1
FaAKR22	maker-Fvb4-1-augustus-gene-38.23	1				1		2	2			3		1	1					1						1			1	3
FaAKR23	maker-Fvb4-1-augustus-gene-141.33	1				1		4				4	1				1													4	1	1		1	1
FaAKR24	maker-Fvb4-1-augustus-gene-196.31						1	3	1			2																		4			1	1
FaAKR25	maker-Fvb4-1-augustus-gene-199.65	2							1		1	5		1		1								1	1
FaAKR26	maker-Fvb4-2-augustus-gene-5.52	1				1			3		2	5		1		1		1							1					1
FaAKR27	maker-Fvb4-2-snap-gene-8.66	1						4			3	2		1	1	1		2		1				1					1	5			2
FaAKR28	maker-Fvb4-2-augustus-gene-60.32		1				1	2	2	1		2	1		4	2				1									1		1				2
FaAKR29	maker-Fvb4-2-augustus-gene-211.31			1				2	4			2		1	1															2
FaAKR30	maker-Fvb4-2-augustus-gene-230.22	1						2				1	2	2				1									1			3			1
FaAKR31	maker-Fvb4-2-snap-gene-248.40	2						1	1			3	1				2	2						1									2
FaAKR32	maker-Fvb4-3-snap-gene-4.66	1			1			3	3					1	1			2		1						2			1	5			1
FaAKR33	maker-Fvb4-3-augustus-gene-8.39	1					1	4	1			3	2		1									1						7	1	1	2	2
FaAKR34	maker-Fvb4-3-augustus-gene-8.40			1	1			1				2		1		1		1		1				1					1	2			2
FaAKR35	maker-Fvb4-3-augustus-gene-278.15	1		1				7			1	1	3			1				2	1		1	1		1			2	7
FaAKR36	maker-Fvb4-3-augustus-gene-295.47	1						1				2		1			1	1									1			2			1
FaAKR37	maker-Fvb4-3-augustus-gene-310.40	1						2				2	1				2	2						2						2			1
FaAKR38	maker-Fvb4-4-augustus-gene-6.55	1							1			4		1		1		1							1
FaAKR39	maker-Fvb4-4-snap-gene-10.69				1			2	1		1	2		1		1		1		1									1	4			2
FaAKR40	maker-Fvb4-4-snap-gene-59.50					1		3	1		2	3	1	1	2	2		1												5					1
FaAKR41	augustus_masked-Fvb4-4-processed-gene-152.13				1			2	3			2			3					1									1	2
FaAKR42	maker-Fvb4-4-augustus-gene-255.41			1				6	1		2	6		1	2											1				6
FaAKR43	maker-Fvb5-1-augustus-gene-110.33				1							4			2	1	2	2												1			1
FaAKR44	maker-Fvb5-2-augustus-gene-103.34		1					3	5			7				2	1				1					1				2
FaAKR45	maker-Fvb5-3-augustus-gene-178.32	2	1		1	1			2			7	1	2	1		1														1		1
FaAKR46	augustus_masked-Fvb5-4-processed-gene-82.0							1	4			1					1									1
FaAKR47	maker-Fvb6-1-augustus-gene-85.45							3	6		1	1	1	1																3		2	1
FaAKR48	maker-Fvb6-1-snap-gene-274.55	1				2		5	4				1																	3			1		1
FaAKR49	maker-Fvb6-1-augustus-gene-274.43							2			1	1	2		1	1	1													2			2
FaAKR50	snap_masked-Fvb6-1-processed-gene-274.24			1					4		1	1	1	1	2	1		1			1		1							1			1
FaAKR51	maker-Fvb6-1-augustus-gene-274.46					1		3	1			8		1	1		3	1												4		1	1
FaAKR52	snap_masked-Fvb6-1-processed-gene-343.36	1					1	2			1	4	2												1					2
FaAKR53	augustus_masked-Fvb6-1-processed-gene-343.15			1			1	1	1		1	1		1	1	1	1													1			2
FaAKR54	maker-Fvb6-1-augustus-gene-343.59					1		2	1		1	1		1			1							1						2
FaAKR55	maker-Fvb6-2-snap-gene-196.46					1		3	1		1	6	7				1	2			1									3					2
FaAKR56	maker-Fvb6-2-snap-gene-197.49				1			1							2			2		1									1	1	1			2
FaAKR57	maker-Fvb6-2-augustus-gene-197.37					1		1	2		2	7		2	2		2	1												2		1
FaAKR58	maker-Fvb6-2-snap-gene-258.96	1						6	3			1		1	2										1					5		1
FaAKR59	maker-Fvb6-2-augustus-gene-356.30				1	1		2	2			2		1																3		1			1
FaAKR60	maker-Fvb6-3-snap-gene-338.42							5	3				1				4	1												5					1
FaAKR61	maker-Fvb6-3-augustus-gene-338.32				1	1		5	1		2	1		1	1			2					1							8			2
FaAKR62	maker-Fvb6-3-snap-gene-338.48							4	8		1	6	1	1			2			2	1								2	3			1
FaAKR63	maker-Fvb6-3-snap-gene-402.99	1			1		1	4	1		1		1		3			1					1							4			1
FaAKR64	maker-Fvb6-3-snap-gene-406.72	1			2	1		1	2		1	1		1	2			1		1						1			1	2	1
FaAKR65	maker-Fvb6-3-snap-gene-407.72			1	1		1	1				1			2		1	1												1
FaAKR66	maker-Fvb6-4-snap-gene-36.67				1		1	2	4			1	1		1		1						1							2
FaAKR67	augustus_masked-Fvb6-4-processed-gene-94.0					1		2	2			1			1	2								2							1				5
FaAKR68	maker-Fvb6-4-augustus-gene-94.25	1				1		1	1			2		1	3	2		2												1				1
FaAKR69	augustus_masked-Fvb6-4-processed-gene-289.0				1	2		4	2			1			1	1														4		1		1	1
FaAKR70	maker-Fvb7-1-augustus-gene-274.53				1			1	1			2							1								1			1	1
FaAKR71	maker-Fvb7-1-augustus-gene-288.56				1			1	1			2							1								1			1	1
FaAKR72	maker-Fvb7-1-snap-gene-299.78					1		1	1		1	3	2		1	1														1			1
FaAKR73	maker-Fvb7-1-augustus-gene-315.58					1		1	1		1	3	3		1	1														1			1
FaAKR74	maker-Fvb7-2-augustus-gene-259.62							1	2			1		1	1				1	1									1	1	1
FaAKR75	maker-Fvb7-2-augustus-gene-262.58				1			1	2			1		1	1				1	1									1	1	1
FaAKR76	maker-Fvb7-3-augustus-gene-18.53					1		2	3			5	2		3	1		1												3			1	1
FaAKR77	maker-Fvb7-3-augustus-gene-43.53								2			1		1	1		1		1	1									1		1		2
FaAKR78	augustus_masked-Fvb7-3-processed-gene-44.10								2			1		1	1		1		1	1									1		1		2
FaAKR79	maker-Fvb7-4-augustus-gene-7.43					1		1	1		1	2	3		1	1														1			2
FaAKR80	maker-Fvb7-4-augustus-gene-33.48							3	1			3	1	2	1		1													3	1		1
Total		34	3	12	21	26	13	165	149	2	35	207	52	48	66	36	42	40	6	20	5	1	7	12	5	11	7	7	20	196	19	15	59	11	20
