# Supplementary material for: Genome-Wide Analysis of Ascorbic Acid Metabolism Related Genes in Fragaria × ananassa and Its Expression Pattern Analysis in Strawberry Fruits
Source: Front Plant Sci. 2022 Jul 6;13:954505. doi: 10.3389/fpls.2022.954505 (PMC9296770; doi:10.3389/fpls.2022.954505)
Supplement: Supplementary file 6 [file Table_6.XLSX]

## Sheet: Sheet1
Supplementary Table 6 The expression level of FaAKR genes in achenes and receptacles at four ripening stages, leaves and roots of octoploid strawberry ‘Camarosa’. Green_A, green achene; White_A, white achene; Turning_A, turning achene; Red_A, red achene; Green_R, green receptacle; White_R, white receptacle; Turning_R, turning receptacle; Red_R, red receptacle.
Gene name	Gene locus	Expression level (TPM)
		Green_A	White_A	Turning_A	Red_A	Green_R	White_R	Turning_R	Red_R	Leaf	Root
FaAKR1	maker-Fvb2-1-augustus-gene-1.22	5.065	1.55333	0.576667	0.735	15.27	11.4883	8.67667	4.94833	9.22333	13.4967
FaAKR2	maker-Fvb2-1-augustus-gene-7.38	11.56	3.595	1.44667	1.80667	9.28833	7.76833	5.695	7.18333	14.5367	4.4
FaAKR3	maker-Fvb2-1-snap-gene-159.62	18.2433	0.996667	0.428333	0.163333	19.2733	27.6817	26.0617	2.29667	32.6067	3.37
FaAKR4	maker-Fvb2-2-augustus-gene-52.66	2.13167	2.15	0.363333	0.493333	1.18667	1	0.211667	0.881667	2.72	2.51333
FaAKR5	maker-Fvb2-2-augustus-gene-156.34	30.5333	5.65333	1.49833	1.83167	59.4217	38.4467	19.5767	7.05333	37.6167	16.6533
FaAKR6	maker-Fvb2-2-augustus-gene-219.47	14.2817	5.22	1.58667	2.01	26.7767	19.875	11.85	7.91	20.5	7.43
FaAKR7	maker-Fvb2-2-augustus-gene-225.38	0.18	0.05	0	0.0333333	0.135	0.01	0.03	0.0133333	0.776667	1.24333
FaAKR8	snap_masked-Fvb2-3-processed-gene-89.22	1.27833	1.46	0.13	0.316667	1.20333	0.835	0.261667	0.403333	3.52667	0.936667
FaAKR9	maker-Fvb2-3-snap-gene-158.34	49.8	9.01	4.25167	9.15667	39.5617	50.875	56.4717	69.3783	27.7233	36.1567
FaAKR10	snap_masked-Fvb2-3-processed-gene-222.21	9.23333	2.82	0.446667	0.675	8.71833	11.8483	8.37	9.225	20.1833	2.43333
FaAKR11	maker-Fvb2-3-augustus-gene-230.24	0.198333	0.01	0.0133333	0	0.163333	0.075	0.015	0.0216667	1.42	0.843333
FaAKR12	maker-Fvb2-4-augustus-gene-3.21	0.483333	0.156667	0.015	0	2.50333	2.74	1.53	0.41	2.29667	0.973333
FaAKR13	maker-Fvb2-4-augustus-gene-9.45	11.105	3.99167	1.20833	1.76333	9.55833	5.76667	4.28333	3.29	10.6433	4.29333
FaAKR14	maker-Fvb2-4-snap-gene-78.43	55.5867	20.02	9.32167	13.6583	57.0017	59.5467	56.3533	41.725	40.4233	36.4633
FaAKR15	maker-Fvb3-2-augustus-gene-103.28	0.311667	0	0	0.0133333	0.0216667	0.0616667	0.0583333	0.01	0.0533333	25.2767
FaAKR16	snap_masked-Fvb3-2-processed-gene-200.24	5.79167	1.30333	0.723333	1.39	4.82667	5.04833	3.00667	3.09667	23.49	1.79
FaAKR17	maker-Fvb3-3-augustus-gene-102.31	0.0416667	0.005	0	0	0.01	0.00833333	0.00666667	0.00666667	0.0266667	8.20667
FaAKR18	augustus_masked-Fvb3-3-processed-gene-178.6	16.0517	3.33667	2.19833	3.64	10.5733	9.11167	4.11	2.82333	56.34	4.78
FaAKR19	maker-Fvb3-4-augustus-gene-111.28	9.07833	2.93167	1.53833	3.115	13.1483	10.3833	4.89833	2.65833	47.02	1.56
FaAKR20	maker-Fvb3-4-augustus-gene-186.32	11.9483	4.75167	6.09333	5.06833	35.7183	19.3	11.0717	4.645	56.7433	2.01667
FaAKR21	maker-Fvb4-1-augustus-gene-24.32	2.73167	0.811667	0.781667	1.17167	1.165	1.19	0.371667	0.0616667	25.0767	0.386667
FaAKR22	maker-Fvb4-1-augustus-gene-38.23	42.2433	26.5917	29.7133	34.99	68.435	99.01	103.677	73.8733	20.0067	33.05
FaAKR23	maker-Fvb4-1-augustus-gene-141.33	30.9567	45.5717	65.4683	223.003	99.8717	1984.63	9573.16	14152.9	36.79	23.8033
FaAKR24	maker-Fvb4-1-augustus-gene-196.31	1.68833	2.18667	3.16333	16.6083	21.2183	189.793	724.77	1136.74	6.97	1.03
FaAKR25	maker-Fvb4-1-augustus-gene-199.65	7.94333	1.05333	0.653333	0.92	7.16833	2.46833	4.45167	4.86667	3.77333	9.24667
FaAKR26	maker-Fvb4-2-augustus-gene-5.52	3.65	1.04	0.795	0.983333	3.53	2.79667	2.70667	2.55333	3.42667	5.28333
FaAKR27	maker-Fvb4-2-snap-gene-8.66	0.131667	0.203333	0.313333	0.476667	0.641667	10.1167	18.59	31.3283	1.94	6.11
FaAKR28	maker-Fvb4-2-augustus-gene-60.32	0	0	0	0	0	0	0	0	0	0.58
FaAKR29	maker-Fvb4-2-augustus-gene-211.31	45.28	38.2983	43.415	54.6633	52.1033	88.1083	92.18	62.325	28.09	28.5867
FaAKR30	maker-Fvb4-2-augustus-gene-230.22	2.25167	0.495	0.278333	0.801667	0.66	0.513333	0.0483333	0.0433333	14.26	0.306667
FaAKR31	maker-Fvb4-2-snap-gene-248.40	0.055	0	0	0	0	0	0	0	0	4.79667
FaAKR32	maker-Fvb4-3-snap-gene-4.66	9.90333	18.2017	9.81167	10.195	15.5067	23.0783	7.935	14.535	11.2633	19.98
FaAKR33	maker-Fvb4-3-augustus-gene-8.39	3.70167	1.32833	4.325	2.50833	3.195	15.795	31.7317	43.6117	4.08	24.2267
FaAKR34	maker-Fvb4-3-augustus-gene-8.40	5.36167	2.50167	1.2	0.818333	0.746667	0.558333	0.291667	0.0516667	168.863	1.45333
FaAKR35	maker-Fvb4-3-augustus-gene-278.15	91.9617	33.5317	32.7817	47.1983	109.47	225.47	241.812	157.225	25.6733	39.1567
FaAKR36	maker-Fvb4-3-augustus-gene-295.47	4.25833	8.51333	9.28	9.97167	1.335	1.98667	0.585	0.723333	29.3633	1.49667
FaAKR37	maker-Fvb4-3-augustus-gene-310.40	0.085	0.116667	0.095	0.0416667	0	0	0	0	0.0433333	162.75
FaAKR38	maker-Fvb4-4-augustus-gene-6.55	11.7617	1.66333	0.955	2.45167	11.5933	6.14167	4.75667	4.61833	8.69667	15.7267
FaAKR39	maker-Fvb4-4-snap-gene-10.69	1	0.225	1.31333	1.7	0.818333	8.77167	14.4483	22.5883	7.36	6.21333
FaAKR40	maker-Fvb4-4-snap-gene-59.50	1.015	0.751667	1.30833	4.07	0.37	0.896667	0.616667	0.585	0.576667	110.38
FaAKR41	augustus_masked-Fvb4-4-processed-gene-152.13	164.142	314.432	114.52	144.948	33.85	37.765	46.135	347.677	25.59	596.08
FaAKR42	maker-Fvb4-4-augustus-gene-255.41	27.48	13.1817	12.3583	15.0883	37.2433	56.265	64.8133	54.5983	10.3833	37.57
FaAKR43	maker-Fvb5-1-augustus-gene-110.33	1.49333	0.34	0.2	0.158333	2.055	2.51	1.26833	0.891667	1.28667	59.0833
FaAKR44	maker-Fvb5-2-augustus-gene-103.34	1.01333	0.528333	0.355	0.6	1.20167	0.613333	0.241667	0.546667	0.876667	16.08
FaAKR45	maker-Fvb5-3-augustus-gene-178.32	0.595	0.396667	0.168333	0.46	0.846667	0.308333	0.178333	0.3	0.556667	5.05
FaAKR46	augustus_masked-Fvb5-4-processed-gene-82.0	0	0	0	0	0	0	0	0	0	0
FaAKR47	maker-Fvb6-1-augustus-gene-85.45	2.98833	0.311667	0.055	0.101667	1.01333	0.926667	0.453333	0.125	7.99	0.0166667
FaAKR48	maker-Fvb6-1-snap-gene-274.55	0.371667	0.0183333	0.0133333	0	0.00833333	0.0166667	0	0.03	0.0733333	0.23
FaAKR49	maker-Fvb6-1-augustus-gene-274.43	10.3417	9.44167	6.815	8.02667	15.89	36.95	37.235	56.14	13.7433	10.9
FaAKR50	snap_masked-Fvb6-1-processed-gene-274.24	16.0817	6.95333	2.985	3.35333	22.6733	17.2567	16.05	20.6967	20.7567	17.3967
FaAKR51	maker-Fvb6-1-augustus-gene-274.46	0.0416667	0.0116667	0	0.0633333	0.0133333	0.01	0	0	0.0566667	0.04
FaAKR52	snap_masked-Fvb6-1-processed-gene-343.36	34.545	53.2133	11.47	15.7933	43.4733	75.1183	52.1083	28.3183	35.3067	534.18
FaAKR53	augustus_masked-Fvb6-1-processed-gene-343.15	17.8017	2.91667	0.611667	1.91167	7.42	4.57	13.1517	51.2667	8.36333	9.03333
FaAKR54	maker-Fvb6-1-augustus-gene-343.59	0.0433333	0.01	0	0	0.0933333	0.0366667	0.0283333	0.0933333	0.243333	0.06
FaAKR55	maker-Fvb6-2-snap-gene-196.46	0.02	0	0	0	0	0.0416667	0.02	0	0.0266667	0.14
FaAKR56	maker-Fvb6-2-snap-gene-197.49	4.27667	1.47	0.833333	0.76	3.07667	3.10667	1.955	1.935	3.31667	5.4
FaAKR57	maker-Fvb6-2-augustus-gene-197.37	0.678333	0.311667	0	0.273333	0.0983333	0.0566667	0.0866667	0.215	0.64	0.156667
FaAKR58	maker-Fvb6-2-snap-gene-258.96	0.798333	0.141667	0.075	0.368333	0.231667	0.045	0.0816667	2.005	0.326667	3.43667
FaAKR59	maker-Fvb6-2-augustus-gene-356.30	5.83	0.658333	0.286667	0.821667	1.435	2.14167	1.305	0.348333	16.9933	0.0433333
FaAKR60	maker-Fvb6-3-snap-gene-338.42	3.23	0.045	0	0.025	0.44	0.0816667	0	0	2.54333	1.67
FaAKR61	maker-Fvb6-3-augustus-gene-338.32	16.2583	9.59667	2.98833	5.4	57.5217	94.1767	78.43	45	39.5833	8.02
FaAKR62	maker-Fvb6-3-snap-gene-338.48	14.1583	6.78333	2.03667	3.11333	14.8117	15.765	14.1583	14.4317	10.6433	12.4067
FaAKR63	maker-Fvb6-3-snap-gene-402.99	3.52833	0.733333	0.348333	1.11833	1.45167	1.02667	0.898333	1.42	1.59	1.97
FaAKR64	maker-Fvb6-3-snap-gene-406.72	0.775	0.0216667	0.0216667	0.0266667	0.315	0.345	0.211667	0.376667	0.44	0.386667
FaAKR65	maker-Fvb6-3-snap-gene-407.72	11.8083	5.46	1.37167	5.42833	2.77667	0.336667	0.025	1.97667	4.21333	2.87
FaAKR66	maker-Fvb6-4-snap-gene-36.67	5.5	2.67833	1.56667	2.14833	3.96167	4.7	3.54667	5.05	4.59667	7.55333
FaAKR67	augustus_masked-Fvb6-4-processed-gene-94.0	7.92167	0.225	0.01	0.075	10.7583	2.795	0.958333	0.743333	19.2633	5.59333
FaAKR68	maker-Fvb6-4-augustus-gene-94.25	10.0233	4.765	1.38	2.34167	17.4783	10.9833	6.68667	6.24333	8.34667	7.99333
FaAKR69	augustus_masked-Fvb6-4-processed-gene-289.0	3.49	0.916667	0.176667	0.126667	0.568333	0.135	0.0866667	0	9.71	0.126667
FaAKR70	maker-Fvb7-1-augustus-gene-274.53	0	0	0	0	0	0	0	0	0.26	0
FaAKR71	maker-Fvb7-1-augustus-gene-288.56	0.0216667	0.06	0.025	0.0716667	0	0.015	0	0	0.876667	0.146667
FaAKR72	maker-Fvb7-1-snap-gene-299.78	37.5267	16.5983	3.76333	5.68167	49.675	46.7617	44.8217	41.8733	46.5	27.14
FaAKR73	maker-Fvb7-1-augustus-gene-315.58	23.1717	10.1333	2.145	4.11833	23.695	24.98	24.7683	24.935	10.47	27.58
FaAKR74	maker-Fvb7-2-augustus-gene-259.62	0	0.0733333	0	0.065	0	0	0	0	0	0
FaAKR75	maker-Fvb7-2-augustus-gene-262.58	0	0	0	0.0333333	0	0	0	0	0	0
FaAKR76	maker-Fvb7-3-augustus-gene-18.53	35.8217	12.495	2.78833	5.28167	33.7867	35.1283	32.99	33.1217	36.95	20.3767
FaAKR77	maker-Fvb7-3-augustus-gene-43.53	0	0	0	0	0	0	0	0	0.166667	0
FaAKR78	augustus_masked-Fvb7-3-processed-gene-44.10	0	0	0	0	0	0	0	0	0.0666667	0
FaAKR79	maker-Fvb7-4-augustus-gene-7.43	72.7967	34.7333	9.01167	12.875	68.91	66.8167	63.1667	58.295	66.8833	49.53
FaAKR80	maker-Fvb7-4-augustus-gene-33.48	0	0	0	0.0316667	0	0	0	0	0.583333	0.0266667
