# Supplementary material for: Genome-Wide Analysis of Ascorbic Acid Metabolism Related Genes in Fragaria × ananassa and Its Expression Pattern Analysis in Strawberry Fruits
Source: Front Plant Sci. 2022 Jul 6;13:954505. doi: 10.3389/fpls.2022.954505 (PMC9296770; doi:10.3389/fpls.2022.954505)
Supplement: Supplementary file 7 [file Table_7.XLSX]

## Sheet: Sheet1
Supplementary Table 7 The expression level of FaAKR genes in response to plant hormone treatment in octoploid strawberry ‘Toyonoka’. CK, ABA and NDGA represents control, abscisic acid and nordihydroguaiaretic acid-treated fruits, respectively. The number in the sample name means days after the treatment.
Gene name	Gene locus	Expression level (TPM)
		CK0	CK5	CK8	ABA5	ABA8	NDGA5	NDGA8
FaAKR1	maker-Fvb2-1-augustus-gene-1.22	5.44	0.605	6.72	0.35	0.115	3.04	1.735
FaAKR2	maker-Fvb2-1-augustus-gene-7.38	6.415	5.755	9.07	5.085	5.135	7.52	9.585
FaAKR3	maker-Fvb2-1-snap-gene-159.62	7.04	22.68	51.71	14.885	7.485	37.25	59.155
FaAKR4	maker-Fvb2-2-augustus-gene-52.66	2.575	3.305	1.92	3.18	2.45	3.025	4.14
FaAKR5	maker-Fvb2-2-augustus-gene-156.34	33.99	24.265	23.28	17.725	10.33	35.84	35.095
FaAKR6	maker-Fvb2-2-augustus-gene-219.47	18.54	11.7	12.25	10.215	6.2	16.305	18.43
FaAKR7	maker-Fvb2-2-augustus-gene-225.38	0.29	0.2	0.16	0.065	0.045	0.375	0.15
FaAKR8	snap_masked-Fvb2-3-processed-gene-89.22	2.125	1.37	2.015	1.515	0.72	2.605	2.175
FaAKR9	maker-Fvb2-3-snap-gene-158.34	42.23	30.19	33.88	33.545	24.55	33.655	30.225
FaAKR10	snap_masked-Fvb2-3-processed-gene-222.21	10.795	9.845	11.715	7.82	7.505	10.215	13.735
FaAKR11	maker-Fvb2-3-augustus-gene-230.24	1.005	0.14	1.185	0.055	0.045	0.845	0.43
FaAKR12	maker-Fvb2-4-augustus-gene-3.21	1.42	3.135	2.825	2.945	1.025	4.015	3.44
FaAKR13	maker-Fvb2-4-augustus-gene-9.45	22.57	12.535	14.93	10.715	6.985	14.605	15.135
FaAKR14	maker-Fvb2-4-snap-gene-78.43	63.175	53.135	50.41	49.76	36.9	58.45	58.72
FaAKR15	maker-Fvb3-2-augustus-gene-103.28	0.245	0.215	0.58	0.27	0.29	0.315	0.33
FaAKR16	snap_masked-Fvb3-2-processed-gene-200.24	6.185	5.615	7.345	5.77	4.97	5.945	6.73
FaAKR17	maker-Fvb3-3-augustus-gene-102.31	0.02	0.01	0.005	0.005	0	0.005	0.01
FaAKR18	augustus_masked-Fvb3-3-processed-gene-178.6	7.02	5.79	6.29	4.115	3.06	7.225	6.885
FaAKR19	maker-Fvb3-4-augustus-gene-111.28	8.155	3.595	3.895	4.55	1.81	4.905	4.355
FaAKR20	maker-Fvb3-4-augustus-gene-186.32	42.62	19.31	18.62	13.695	5.47	29.95	18.435
FaAKR21	maker-Fvb4-1-augustus-gene-24.32	1.525	0.425	0.925	0.665	0.825	0.73	1.21
FaAKR22	maker-Fvb4-1-augustus-gene-38.23	127.845	142.87	135.3	113.285	118.485	128.37	120.055
FaAKR23	maker-Fvb4-1-augustus-gene-141.33	425.615	1496.42	3781.43	3800.84	4764.98	690.305	1061.42
FaAKR24	maker-Fvb4-1-augustus-gene-196.31	348.325	256.79	477.415	312.63	181.8	205.75	203.985
FaAKR25	maker-Fvb4-1-augustus-gene-199.65	8.155	5.96	4.95	5.565	3.93	5.16	4.51
FaAKR26	maker-Fvb4-2-augustus-gene-5.52	8.43	3.035	4.54	3.06	2.96	4.13	2.865
FaAKR27	maker-Fvb4-2-snap-gene-8.66	1.84	10.395	2.09	13.59	8.25	3.77	5.565
FaAKR28	maker-Fvb4-2-augustus-gene-60.32	0	0	0	0	0	0	0
FaAKR29	maker-Fvb4-2-augustus-gene-211.31	121.295	156.16	139.235	126.665	140.71	131.605	135.835
FaAKR30	maker-Fvb4-2-augustus-gene-230.22	0.885	0.63	0.865	0.48	0.53	0.52	1.42
FaAKR31	maker-Fvb4-2-snap-gene-248.40	0	0	0	0	0	0	0
FaAKR32	maker-Fvb4-3-snap-gene-4.66	14.49	32.645	15.195	15.805	8.06	41.46	13.59
FaAKR33	maker-Fvb4-3-augustus-gene-8.39	2.985	15.76	2.035	19.69	9.665	7.365	7.265
FaAKR34	maker-Fvb4-3-augustus-gene-8.40	0.595	0.025	0.075	0	0	0.025	0.09
FaAKR35	maker-Fvb4-3-augustus-gene-278.15	211.875	255.49	234.05	203.92	198.275	234.61	223.98
FaAKR36	maker-Fvb4-3-augustus-gene-295.47	1.215	0.805	1.655	1.635	1.25	0.985	2.26
FaAKR37	maker-Fvb4-3-augustus-gene-310.40	0	0	0	0	0	0	0
FaAKR38	maker-Fvb4-4-augustus-gene-6.55	11.865	6.265	6.09	6.08	4.36	5.555	6.175
FaAKR39	maker-Fvb4-4-snap-gene-10.69	4.605	11.695	4.94	19.61	9.485	6.39	9.99
FaAKR40	maker-Fvb4-4-snap-gene-59.50	1.605	0.505	1.35	0.65	0.63	0.86	1.115
FaAKR41	augustus_masked-Fvb4-4-processed-gene-152.13	55.375	24.71	42.24	30.095	35.965	38.99	31.335
FaAKR42	maker-Fvb4-4-augustus-gene-255.41	76.315	86.03	81.85	77.71	83.225	75.685	85.53
FaAKR43	maker-Fvb5-1-augustus-gene-110.33	3.76	1.26	1.675	1.245	0.765	3.625	2.555
FaAKR44	maker-Fvb5-2-augustus-gene-103.34	0.605	0.395	0.415	0.47	0.38	0.56	0.325
FaAKR45	maker-Fvb5-3-augustus-gene-178.32	0.325	0.255	0.435	0.485	0.36	0.705	0.48
FaAKR46	augustus_masked-Fvb5-4-processed-gene-82.0	0	0	0	0	0	0	0
FaAKR47	maker-Fvb6-1-augustus-gene-85.45	0.3	0.065	0.09	0.21	0.07	0.035	0.17
FaAKR48	maker-Fvb6-1-snap-gene-274.55	1.19	0.305	0.52	0.22	0.155	0.495	0.585
FaAKR49	maker-Fvb6-1-augustus-gene-274.43	82.27	39.195	59.185	41.145	23.495	66.655	45.23
FaAKR50	snap_masked-Fvb6-1-processed-gene-274.24	38.695	15.515	23.425	15.365	8.135	23.535	21.18
FaAKR51	maker-Fvb6-1-augustus-gene-274.46	0.455	0	0.61	0.035	0.02	0.24	0.16
FaAKR52	snap_masked-Fvb6-1-processed-gene-343.36	67.7	32.515	50.64	26.815	8.495	56.815	45.09
FaAKR53	augustus_masked-Fvb6-1-processed-gene-343.15	5.315	3.86	7.015	7.34	9.22	5.325	3.87
FaAKR54	maker-Fvb6-1-augustus-gene-343.59	0.095	0.02	0.03	0.015	0.03	0	0.105
FaAKR55	maker-Fvb6-2-snap-gene-196.46	0.23	0	0.09	0	0	0	0.055
FaAKR56	maker-Fvb6-2-snap-gene-197.49	3.66	3.7	4.485	3.735	2.885	4.32	5.515
FaAKR57	maker-Fvb6-2-augustus-gene-197.37	0	0.15	0.26	0.195	0.185	0.09	0.175
FaAKR58	maker-Fvb6-2-snap-gene-258.96	0.23	0	0.155	0.03	0.03	0.03	0.015
FaAKR59	maker-Fvb6-2-augustus-gene-356.30	0.855	0.35	0.855	1.55	0.365	0.355	0.335
FaAKR60	maker-Fvb6-3-snap-gene-338.42	0.22	0.115	0.07	0.115	0.015	0.2	0.14
FaAKR61	maker-Fvb6-3-augustus-gene-338.32	100.18	71.015	79.345	85.92	61.52	91.335	79.73
FaAKR62	maker-Fvb6-3-snap-gene-338.48	16.685	14.15	16.84	11.825	8.64	15.18	16.69
FaAKR63	maker-Fvb6-3-snap-gene-402.99	1.865	1.15	1.555	1.235	0.845	1.405	1.245
FaAKR64	maker-Fvb6-3-snap-gene-406.72	0.76	0.265	0.55	0.335	0.175	0.42	0.275
FaAKR65	maker-Fvb6-3-snap-gene-407.72	0.745	0	0.175	0	0.02	0.08	0.03
FaAKR66	maker-Fvb6-4-snap-gene-36.67	6.44	5.625	6.66	6.835	6.05	5.74	6.785
FaAKR67	augustus_masked-Fvb6-4-processed-gene-94.0	3.73	1.13	1.16	0.515	0.4	1.43	2.275
FaAKR68	maker-Fvb6-4-augustus-gene-94.25	14.31	11.815	13.06	10.1	8.595	13.975	17.355
FaAKR69	augustus_masked-Fvb6-4-processed-gene-289.0	0	0	0.06	0.14	0	0.12	0.06
FaAKR70	maker-Fvb7-1-augustus-gene-274.53	0	0	0.03	0	0	0	0
FaAKR71	maker-Fvb7-1-augustus-gene-288.56	0	0	0.245	0	0.03	0	0
FaAKR72	maker-Fvb7-1-snap-gene-299.78	31.28	22.045	31.98	16.79	15.055	27.485	26.21
FaAKR73	maker-Fvb7-1-augustus-gene-315.58	23.7	37.795	25.745	29.355	26.705	30.23	34.29
FaAKR74	maker-Fvb7-2-augustus-gene-259.62	0	0	0	0	0	0	0
FaAKR75	maker-Fvb7-2-augustus-gene-262.58	0.035	0	0.06	0	0	0.03	0
FaAKR76	maker-Fvb7-3-augustus-gene-18.53	47.13	52.33	49.97	39.81	36.865	49.83	52.985
FaAKR77	maker-Fvb7-3-augustus-gene-43.53	0	0	0.12	0	0	0	0
FaAKR78	augustus_masked-Fvb7-3-processed-gene-44.10	0.065	0	0.035	0	0	0.13	0.085
FaAKR79	maker-Fvb7-4-augustus-gene-7.43	88.18	104.98	94.285	80.155	75.315	94.69	107.795
FaAKR80	maker-Fvb7-4-augustus-gene-33.48	0	0	0.03	0	0	0	0
